# Supplementary material for: Co-regulation of photosynthetic capacity by nitrogen, phosphorus and magnesium in a subtropical Karst forest in China
Source: PubMed Central journal article supplement (PMC5943327; doi:10.1038/s41598-018-25839-1), 2018-05-09
Supplement: 41598_2018_25839_MOESM1_ESM.pdf [file 41598_2018_25839_MOESM1_ESM.pdf]

## **Supplementary Information**

### **Co-regulation of photosynthetic capacity by nitrogen, phosphorus and magnesium in a subtropical Karst forest in China**

Jing Wang<sup>1,2,3</sup>; Xuefa Wen<sup>1,2\*</sup>, Xinyu Zhang<sup>1,2\*</sup>, Shenggong Li<sup>1,2</sup>, Da-Yong Zhang<sup>3</sup>

## Contents of supplementary information

**Supplementary Table S1.** The area-based and dry mass-based light saturated assimilation rates ( $A_{\text{sat}}$ ), maximum rate of photosynthetic carboxylation ( $V_{\text{cmax}}$ ), and maximum rate of photosynthetic electron transport ( $J_{\text{max}}$ ) of dominant species (n=63) selected from a subtropical mature forest in the Karst critical zone in Southwestern China.

**Supplementary Table S2.** The averaged leaf nutrient concentrations, leaf mass per area (LMA), and leaf thickness ( $LT$ ).

**Supplementary Table S3.** Pearson correlations of the area-based photosynthetic capacity ( $A_{\text{sat}}$ ,  $V_{\text{cmax}}$ , and  $J_{\text{max}}$ ) with leaf nutrient contents and leaf thickness ( $LT$ ).  $A_{\text{sat}}$ : the light-saturated net photosynthesis;  $V_{\text{cmax}}$ : the maximum carboxylation rate;  $J_{\text{max}}$ : the maximum electron transport rate.

**Supplementary Table S4.** Coefficients of multivariate stepwise regression.  $V_{\text{cmax}}$ : the maximum carboxylation rate;  $J_{\text{max}}$ : the maximum electron transport rate.

**Supplementary Table S5.** Pearson correlations of mass-based leaf nutrient contents and leaf thickness ( $LT$ ).

**Supplementary Table S6.** Pearson correlations of mass-based photosynthetic capacity ( $V_{\text{cmax}}$  and  $J_{\text{max}}$ ) with leaf nutrient contents and leaf thickness ( $LT$ ).  $A_{\text{sat}}$ : the light-saturated net photosynthesis;  $V_{\text{cmax}}$ : the maximum carboxylation rate;  $J_{\text{max}}$ : the maximum electron transport rate.

**Supplementary Table S7.** Characteristics of soil and leaf in this study site. TN, Total nitrogen; TP, total phosphorus; TCa, total calcium; TMg, total magnesium; TK, total potassium; TNa, total sodium; AN, available soil nitrogen; AP, available soil phosphorus.

**Figure S1.** Relationships between of the  $A_{\text{sat}}$  ( $\text{nmol g}^{-1} \text{s}^{-1}$ ) and leaf traits.  $A_{\text{sat}}$ , the light-saturated net photosynthesis;  $LT$ , leaf thickness (mm); Leaf nutrients ( $\text{mg g}^{-1}$ ).

**Figure S2.** Relationships between of  $V_{\text{cmax}}$  ( $\mu\text{mol g}^{-1} \text{s}^{-1}$ ) and leaf traits.  $V_{\text{cmax}}$ , the maximum carboxylation rate;  $LT$ , leaf thickness (mm); Leaf nutrients ( $\text{mg g}^{-1}$ ).

**Figure S3.** Relationships between of  $J_{\max}$  ( $\mu\text{mol g}^{-1} \text{s}^{-1}$ ) with leaf traits( $\text{mg g}^{-1}$ ).  $J_{\max}$ , the maximum electron transport rate;  $LT$ , leaf thickness (mm); Leaf nutrients ( $\text{mg g}^{-1}$ ).

Supplementary Table S1. The area-based and dry mass-based light saturated assimilation rates ( $A_{\text{sat}}$ ), maximum rate of photosynthetic carboxylation ( $V_{\text{cmax}}$ ), and maximum rate of photosynthetic electron transport ( $J_{\text{max}}$ ) of dominant species (n=63) selected from a subtropical mature forest in the Karst critical zone in Southwestern China.

| Species                                                                      | $A_{\text{sat}}$<br>( $\mu\text{mol m}^{-2} \text{s}^{-1}$ ) | $V_{\text{cmax}}$<br>( $\mu\text{mol m}^{-2} \text{s}^{-1}$ ) | $J_{\text{max}}$<br>( $\mu\text{mol m}^{-2} \text{s}^{-1}$ ) | $A_{\text{sat}}$<br>( $\text{nmol g}^{-1} \text{s}^{-1}$ ) | $V_{\text{cmax}}$<br>( $\text{nmol g}^{-1} \text{s}^{-1}$ ) | $J_{\text{max}}$<br>( $\text{nmol g}^{-1} \text{s}^{-1}$ ) |
|------------------------------------------------------------------------------|--------------------------------------------------------------|---------------------------------------------------------------|--------------------------------------------------------------|------------------------------------------------------------|-------------------------------------------------------------|------------------------------------------------------------|
| <i>Ligustrum lucidum</i> Ait.                                                | 11.73±0.91                                                   | 54.39±3.72                                                    | 93.71±10.54                                                  | 149.43±11.56                                               | 692.68±47.34                                                | 1193.47±7.33                                               |
| <i>Rhamnus leptophylla</i> Schneid.                                          | 12.53±0.4                                                    | 55.5±3.42                                                     | 107.27±5.29                                                  | 187.11±6.03                                                | 828.61±51.07                                                | 1601.41±7.11                                               |
| <i>Lindera communis</i> Hemsl.                                               | 9.09±0.38                                                    | 39.71±3.5                                                     | 60.11±1.52                                                   | 93.12±3.86                                                 | 406.82±35.84                                                | 615.81±0.82                                                |
| <i>Itea yunnanensis</i> Franch                                               | 6.91±0.77                                                    | 35.61±3.75                                                    | 80.67±3.84                                                   | 72.82±8.08                                                 | 375.23±39.55                                                | 850.12±1.84                                                |
| <i>Pittosporum brevicalyx</i> (Oliv.) Gagnep                                 | 7.36±0.77                                                    | 39.39±3.6                                                     | 79.46±11.27                                                  | 112.12±11.75                                               | 600.42±54.81                                                | 1211.33±15.38                                              |
| <i>Litsea rubescens</i> Lec.                                                 | 11.9±1.54                                                    | 63.74±6.8                                                     | 125.42±8.59                                                  | 320.8±41.5                                                 | 1718.29±183.39                                              | 3381.03±28.75                                              |
| <i>Broussonetia papyifera</i> (Linn.) L'Hert. ex<br>Vent.                    | 15.67±1.55                                                   | 70.85±10.45                                                   | 112.86±7.02                                                  | 236.41±23.39                                               | 1069.04±157.75                                              | 1703.03±15.13                                              |
| <i>Machilus microcarpa</i> Hemsl.                                            | 7.69±2.05                                                    | 37.06±6.33                                                    | 64.75±5.64                                                   | 171.3±45.77                                                | 825.6±140.89                                                | 1442.28±12.34                                              |
| <i>Rhus chinensis</i> Mill.                                                  | 14.9±0.3                                                     | 69.31±0.66                                                    | 103.12±22.19                                                 | 187.6±3.78                                                 | 872.64±8.28                                                 | 1298.31±25.99                                              |
| <i>Melia azedarach</i> L.                                                    | 14.13±1.44                                                   | 73.09±6.32                                                    | 121.38±13.43                                                 | 146.68±14.91                                               | 758.53±65.55                                                | 1259.77±14.64                                              |
| <i>Populus × canadensis</i> Moench.                                          | 9.64±1.34                                                    | 42.39±4.47                                                    | 70.86±5.69                                                   | 80.21±11.11                                                | 352.67±37.22                                                | 589.57±2.5                                                 |
| <i>Camptotheca acuminata</i> Decne.                                          | 10.16±1.81                                                   | 48.57±1.89                                                    | 91.35±0.65                                                   | 169.97±30.25                                               | 812.19±31.56                                                | 1527.7±1.01                                                |
| <i>Cinnamomum bodinieri</i> Levl.                                            | 13.07±2.26                                                   | 65.65±3.81                                                    | 122.71±13.1                                                  | 143.16±24.75                                               | 719.24±41.79                                                | 1344.44±6.79                                               |
| <i>Catalpa ovata</i> G. Don                                                  | 23.67±1.33                                                   | 99.56±10.68                                                   | 147.64±20.04                                                 | 441.09±24.82                                               | 1855.61±199.12                                              | 2751.74±40.47                                              |
| <i>Toona sinensis</i> (A. Juss.) Roem.                                       | 9±1.94                                                       | 42.35±7.07                                                    | 79.13±3.01                                                   | 361.72±78.08                                               | 1702.16±284.28                                              | 3180.52±8.32                                               |
| <i>Sapium sebiferum</i> (Linn.) Roxb.                                        | 14.47±2.74                                                   | 65.21±6.74                                                    | 98.95±7.5                                                    | 192.57±36.51                                               | 867.99±89.72                                                | 1317.17±9.19                                               |
| <i>Alangium chinense</i> (Lour.) Harms                                       | 11.16±0.62                                                   | 57.84±5.56                                                    | 104.6±9.08                                                   | 127.44±7.13                                                | 660.55±63.51                                                | 1194.53±11.33                                              |
| <i>Cladrastis platycarpa</i> (Maxim.) Makino                                 | 11.55±1.62                                                   | 59.29±5.66                                                    | 116.21±10.78                                                 | 234.66±32.92                                               | 1204.17±114.89                                              | 2360.25±12.66                                              |
| <i>Ulmus pumila</i> L.                                                       | 10.77±1.19                                                   | 43.17±12.11                                                   | 57.84±15.4                                                   | 157.42±17.34                                               | 630.83±176.98                                               | 845.31±17.61                                               |
| <i>Ilex macrocarpa</i> Oliv.                                                 | 6.29±0.3                                                     | 38.75±0.97                                                    | 90.17±2.85                                                   | 76.28±3.61                                                 | 469.95±11.76                                                | 1093.47±1.98                                               |
| <i>Ziziphus jujuba</i> Mill.<br>var. <i>spinosa</i> (Bunge) Hu ex H. F. Chow | 15.17±0.55                                                   | 62.11±2.07                                                    | 96.58±4.97                                                   | 107.03±3.89                                                | 438.29±14.58                                                | 681.54±4.63                                                |

|                                              |            |             |              |              |                |               |
|----------------------------------------------|------------|-------------|--------------|--------------|----------------|---------------|
| <i>Vitex canescens</i> Kurz                  | 10.7±1.91  | 56.15±5.67  | 84.21±5.02   | 219.85±39.2  | 1153.67±116.47 | 1730.17±8.59  |
| <i>Eriobotrya japonica</i> (Thunb.) Lindl.   | 10.87±0.06 | 51.22±2.77  | 94.13±4.91   | 122.28±0.65  | 576.33±31.15   | 1059.2±4.46   |
| <i>Morus alba</i> L.                         | 13.3±2.72  | 64.18±11.74 | 102.4±17.98  | 484.69±99.2  | 2338.8±427.94  | 3731.84±42.67 |
| <i>Prunus salicina</i> Lindl.                | 12.93±1.12 | 54.66±5.34  | 105.05±12.44 | 242.64±20.92 | 1025.36±100.12 | 1970.72±21.99 |
| <i>Eucommia ulmoides</i> Oliver              | 10.19±0.71 | 48.19±9.4   | 109.39±6.54  | 181.05±12.58 | 856.55±167.1   | 1944.29±15.72 |
| <i>Platycarya strobilacea</i> Sieb. et Zucc. | 11.27±1    | 44.09±3.13  | 92.09±4.45   | 246.52±21.92 | 964.67±68.56   | 2014.9±13.88  |
| <i>Kalopanax septemlobus</i> (Thunb.) Koidz. | 11.47±2.27 | 62.99±13.46 | 95.25±10.96  | 340.74±67.31 | 1870.81±399.87 | 2828.86±30.61 |
| <i>Zanthoxylum armatum</i> DC.               | 13.13±2.86 | 72.76±4.92  | 123.69±30.27 | 100.15±21.86 | 555.12±37.55   | 943.64±18.91  |
| <i>Pyrus calleryana</i>                      | 8.68±0.85  | 40.78±2.17  | 71.86±5.48   | 110.6±10.88  | 519.38±27.6    | 915.21±7.18   |
| <i>Amygdalus persica</i> L. var.             | 16.45±1.06 | 73.36±1.56  | 117.6±3.28   | 222.4±14.38  | 992.1±21.06    | 1590.33±2.7   |
| <i>Euonymus meaacckii</i> Rupr.              | 9.74±0.16  | 55.27±2.57  | 117.33±6.66  | 81.07±1.35   | 459.84±21.35   | 976.2±3.96    |
| <i>Zanthoxylum ovalifolium</i> Wight         | 9.33±1.23  | 56.71±3.05  | 114.9±5.8    | 104.18±13.69 | 632.97±34      | 1282.49±3.64  |
| <i>Cerasus scopulorum</i> (Koehne) Yu et Li  | 13.47±0.83 | 55.01±3.66  | 106.21±4.67  | 178.42±11.03 | 728.76±48.5    | 1407.16±4.57  |
| <i>Carpinus pubescens</i> Burk.              | 5.72±0.66  | 26.8±0      | 52.28±0      | 145.71±16.93 | 682.59±31.06   | 1331.75±8.09  |
| <i>Lithocarpus confinis</i> Huang            | 11.28±1.78 | 53.98±4.59  | 81.33±4.09   | 76.97±12.15  | 368.34±31.35   | 555±2.14      |
| <i>Celtis sinensis</i> Pers.                 | 10.35±2.56 | 47.8±11.87  | 87.64±18.25  | 82.92±20.46  | 382.82±95.07   | 701.95±15.3   |
| <i>Evodia rutaecarpa</i> (Juss.) Benth.      | 9.79±0.97  | 57.9±6.55   | 111.13±9.44  | 74.83±7.42   | 442.67±50.11   | 849.7±5.73    |
| <i>Machilus cavaleriei</i> Levl.             | 8.38±0.49  | 37.17±1.63  | 71.78±10.95  | 65.07±3.78   | 288.74±12.65   | 557.54±7.39   |
| <i>Diospyros kaki</i> Thunb.                 |            |             |              |              |                |               |
| var. <i>silvestris</i> Makino                | 10.74±2.04 | 47.24±5.17  | 81.13±3.51   | 123.92±23.59 | 545.1±59.67    | 936.14±5.24   |
| <i>Rubus inopertus</i> (Diels) Focke         | 14.5±2.23  | 59.77±7.87  | 95.34±9.07   | 380.28±58.59 | 1567.48±206.28 | 2500.36±17.52 |
| <i>Coriaria nepalensis</i> Wall.             | 13.46±0.8  | 65.34±4.17  | 119.16±5.28  | 104.38±6.18  | 506.58±32.3    | 923.89±6.83   |
| <i>Celastrus orbiculatus</i> Thunb.          | 5.23±0.27  | 28.25±2.57  | 61.19±4.98   | 33.81±1.73   | 182.69±16.59   | 395.74±2.7    |
| <i>Wikstroemia scytophylla</i> Diels         | 12.51±2.89 | 66.31±7.24  | 108.41±10.2  | 364.7±84.11  | 1932.99±211    | 3160.37±28.24 |
| <i>Viburnum foetidum</i> Wall.               |            |             |              |              |                |               |
| var. <i>ceanothoides</i> (C. H. Wright)      |            |             |              |              |                |               |
| Hand.-Mazz.                                  | 9.02±0.99  | 39.43±5.56  | 63.86±8.45   | 306.03±33.48 | 1338.25±188.67 | 2167.54±14.42 |
| <i>Hedera nepalensis</i> K. Koch             | 6.66±2.52  | 31.91±9.37  | 54.01±27.19  | 139.05±52.72 | 666.33±195.64  | 1127.71±48.5  |

---

|                                                 |            |             |              |              |                |               |
|-------------------------------------------------|------------|-------------|--------------|--------------|----------------|---------------|
| var. <i>sinensis</i> (Tobl.) Rehd.              |            |             |              |              |                |               |
| <i>Debregeasia longifolia</i> (Burm. f.) Wedd.  | 16.23±1.16 | 69.84±7.83  | 107.47±13.75 | 231.79±16.55 | 997.18±111.81  | 1534.51±16.88 |
| <i>Rubus parvifolius</i> L.                     | 16.33±0.87 | 76.48±11.57 | 111.05±9.32  | 287.08±15.36 | 1344.18±203.26 | 1951.78±12.97 |
| <i>Rosa roxbunghii</i>                          | 12.1±0.7   | 52.38±2.92  | 102.72±5.91  | 95.28±5.51   | 412.49±23.02   | 808.87±5.25   |
| <i>Mallotus repandus</i> (Willd.) Muell. Arg.   | 7.09±1.3   | 36.97±8     | 70.24±15.58  | 160.51±29.47 | 836.61±181.08  | 1589.29±26.93 |
| <i>Mahonia bealei</i> (Fort.) Carr.             | 4.83±0.32  | 23.67±1.11  | 45.9±2.32    | 45.11±2.95   | 221.22±10.4    | 428.98±2.16   |
| <i>Fallopia multiflora</i> (Thunb.) Harald.     | 16.63±4.23 | 78.54±8.48  | 153.18±32.54 | 352.5±89.72  | 1664.4±179.74  | 3246.29±63.99 |
| <i>Conyza canadensis</i> (L.) Cronq.            | 13.9±0.35  | 60.34±2.54  | 97.64±4.62   | 562.03±14.01 | 2439.93±102.77 | 3948.1±5.36   |
| <i>Ipomoea batatas</i> (L.) Lam.                | 17.37±0.85 | 71.7±1.28   | 122.29±4.51  | 276.31±13.53 | 1140.81±20.43  | 1945.76±3.71  |
| <i>Senecio scandens</i> Buch.-Ham. ex D. Don    | 12.27±1.23 | 55.9±5.2    | 97.48±6.98   | 227.97±22.94 | 1038.87±96.68  | 1811.57±10.95 |
| <i>Vitis piasezkii</i> Maxim.                   | 12.53±1.37 | 59.12±3.85  | 103.33±11.85 | 366.25±39.89 | 1727.55±112.49 | 3019.52±31.39 |
| <i>Clematis urophylla</i> Franch.               | 8.1±1.06   | 35.63±1.05  | 76.61±1.57   | 55.45±7.28   | 244.04±7.17    | 524.65±0.44   |
| <i>Bauhinia glauca</i> (Wall. ex Benth.) Benth. | 7.84±1.12  | 35.41±4.54  | 68.07±3.73   | 157.3±22.56  | 710.65±91.17   | 1366.2±1.01   |
| <i>Caesalpinia decapetala</i> (Roth) Alston     | 11.27±1.42 | 52.8±4.24   | 94.84±29.96  | 198.3±24.91  | 929.31±74.66   | 1669.13±49.22 |
| <i>Paederia scandens</i> (Lour.) Merr.          | 10.14±0.66 | 42.62±4.37  | 69.68±9.52   | 250.6±16.33  | 1053.64±108.02 | 1722.51±21.09 |
| <i>Cyclosorus parasiticus</i> (L.) Farwell.     | 7.59±1.3   | 35.4±4.2    | 72.38±8.91   | 185.74±31.71 | 866.4±102.71   | 1771.27±24.29 |
| <i>Cyrtomium fortunei</i> J. Sm.                | 3.24±0.47  | 16.72±3     | 36.58±6.56   | 95.64±13.76  | 493.49±88.57   | 1079.82±24.58 |
| <i>Pteris vittata</i> L.                        | 9±2.95     | 49.2±12     | 84.99±29.55  | 155.39±50.97 | 849.69±207.18  | 1467.88±50.61 |

---

Table S2. The averaged leaf nutrient concentrations, leaf mass per area (LMA), and leaf thickness (*LT*).

| Species                                                                   | N<br>(mg g <sup>-1</sup> ) | P<br>(mg g <sup>-1</sup> ) | Ca<br>(mg g <sup>-1</sup> ) | Mg<br>(mg g <sup>-1</sup> ) | K<br>(mg g <sup>-1</sup> ) | Na<br>(mg g <sup>-1</sup> ) | LMA<br>(mg m <sup>-2</sup> ) | <i>LT</i><br>(mm) |
|---------------------------------------------------------------------------|----------------------------|----------------------------|-----------------------------|-----------------------------|----------------------------|-----------------------------|------------------------------|-------------------|
| <i>Ligustrum lucidum</i> Ait.                                             | 1.328                      | 0.771                      | 15.244                      | 5.170                       | 9.658                      | 0.036                       | 78.519                       | 0.222             |
| <i>Rhamnus leptophylla</i> Schneid.                                       | 2.339                      | 0.826                      | 31.390                      | 3.635                       | 9.484                      | 0.037                       | 66.983                       | 0.140             |
| <i>Lindera communis</i> Hemsl.                                            | 1.739                      | 0.799                      | 6.355                       | 1.415                       | 7.025                      | 0.031                       | 97.613                       | 0.203             |
| <i>Itea yunnanensis</i> Franch                                            | 1.705                      | 0.789                      | 19.636                      | 1.125                       | 8.501                      | 0.032                       | 94.892                       | 0.267             |
| <i>Pittosporum brevicalyx</i> (Oliv.) Gagnep                              | 1.521                      | 0.615                      | 16.309                      | 3.802                       | 13.883                     | 0.198                       | 65.598                       | 0.127             |
| <i>Litsea rubescens</i> Lec.                                              | 2.559                      | 1.179                      | 10.181                      | 6.394                       | 12.255                     | 0.044                       | 37.095                       | 0.108             |
| <i>Broussonetia papyifera</i> (Linn.) L'Hert. ex Vent.                    | 2.592                      | 2.163                      | 31.759                      | 9.203                       | 19.722                     | 0.037                       | 66.270                       | 0.406             |
| <i>Machilus microcarpa</i> Hemsl.                                         | 2.216                      | 1.135                      | 10.402                      | 2.889                       | 10.037                     | 0.059                       | 44.892                       | 0.146             |
| <i>Rhus chinensis</i> Mill.                                               | 1.893                      | 0.783                      | 16.367                      | 1.933                       | 10.814                     | 0.035                       | 79.426                       | 0.311             |
| <i>Melia azedarach</i> L.                                                 | 2.850                      | 1.263                      | 27.791                      | 2.969                       | 12.448                     | 0.061                       | 96.355                       | NAN               |
| <i>Populus × canadensis</i> Moench.                                       | 2.730                      | 0.825                      | 12.114                      | 11.061                      | 1.382                      | 0.212                       | 120.189                      | NAN               |
| <i>Camptotheca acuminata</i> Decne.                                       | 1.816                      | 1.016                      | 21.425                      | 7.259                       | 13.014                     | 0.061                       | 59.795                       | 0.159             |
| <i>Cinnamomum bodinieri</i> Levl.                                         | 1.627                      | 0.771                      | 15.880                      | 2.948                       | 9.077                      | 0.020                       | 91.271                       | 0.222             |
| <i>Catalpa ovata</i> G. Don                                               | 3.192                      | 2.494                      | 15.033                      | 3.021                       | 11.264                     | 0.025                       | 53.655                       | 0.216             |
| <i>Toona sinensis</i> (A. Juss.) Roem.                                    | 3.669                      | 1.146                      | 21.508                      | 3.747                       | 14.082                     | 0.033                       | 24.881                       | 0.089             |
| <i>Sapium sebiferum</i> (Linn.) Roxb.                                     | 3.100                      | 1.474                      | 24.371                      | 3.168                       | 5.630                      | 0.050                       | 75.124                       | NAN               |
| <i>Alangium chinense</i> (Lour.) Harms                                    | 2.553                      | 1.343                      | 18.508                      | 2.695                       | 10.388                     | 0.019                       | 87.566                       | 0.171             |
| <i>Cladrastis platycarpa</i> (Maxim.) Makino                              | 3.111                      | 1.161                      | 41.009                      | 3.584                       | 10.338                     | 0.048                       | 49.234                       | 0.152             |
| <i>Ulmus pumila</i> L.                                                    | 1.659                      | 0.620                      | 20.336                      | 3.022                       | 5.512                      | 0.057                       | 68.427                       | 0.127             |
| <i>Ilex macrocarpa</i> Oliv.                                              | 1.530                      | 0.554                      | 28.395                      | 6.573                       | 39.634                     | 0.008                       | 82.459                       | NAN               |
| <i>Ziziphus jujuba</i> Mill. var. <i>spinosa</i> (Bunge) Hu ex H. F. Chow | 3.290                      | 1.112                      | 3.565                       | 1.744                       | 7.390                      | 0.001                       | 141.703                      | NAN               |
| <i>Vitex canescens</i> Kurz                                               | 1.290                      | 2.358                      | 7.376                       | 9.730                       | 18.223                     | 0.057                       | 48.669                       | NAN               |
| <i>Eriobotrya japonica</i> (Thunb.) Lindl.                                | 1.200                      | 0.539                      | 19.454                      | 4.230                       | 12.478                     | 0.040                       | 88.868                       | 0.248             |
| <i>Morus alba</i> L.                                                      | 3.521                      | 1.129                      | 23.645                      | 5.478                       | 13.924                     | 0.058                       | 27.440                       | 0.095             |

|                                                                                    |       |       |        |        |        |       |         |       |
|------------------------------------------------------------------------------------|-------|-------|--------|--------|--------|-------|---------|-------|
| <i>Prunus salicina</i> Lindl.                                                      | 1.754 | 0.936 | 25.255 | 3.432  | 18.318 | 0.067 | 53.303  | 0.121 |
| <i>Eucommia ulmoides</i> Oliver                                                    | 2.304 | 1.182 | 6.191  | 1.854  | 15.270 | 0.052 | 56.264  | 0.254 |
| <i>Platycarya strobilacea</i> Sieb. et Zucc.                                       | 2.266 | 0.622 | 21.852 | 6.706  | 4.004  | 0.019 | 45.703  | 0.152 |
| <i>Kalopanax septemlobus</i> (Thunb.) Koidz.                                       | 1.664 | 0.945 | 17.731 | 5.708  | 7.267  | 0.041 | 33.671  | 0.121 |
| <i>Zanthoxylum armatum</i> DC.                                                     | 1.857 | 1.471 | 22.775 | 4.117  | 13.244 | 0.030 | 131.075 | 0.368 |
| <i>Pyrus calleryana</i>                                                            | 1.862 | 0.835 | 14.544 | 4.445  | 6.919  | 0.047 | 78.514  | 0.159 |
| <i>Amygdalus persica</i> L. var.                                                   | 1.974 | 0.943 | 23.177 | 8.613  | 5.234  | 0.056 | 73.947  | 0.140 |
| <i>Euonymus meaacckii</i> Rupr.                                                    | 2.120 | 2.585 | 32.244 | 9.182  | 11.999 | 0.096 | 120.189 | NAN   |
| <i>Zanthoxylum ovalifolium</i> Wight                                               | 1.974 | 0.640 | 22.740 | 3.734  | 8.625  | 0.053 | 89.589  | 0.203 |
| <i>Cerasus scopulorum</i> (Koehne) Yu et Li                                        | 1.792 | 1.652 | 10.153 | 3.535  | 16.632 | 0.080 | 75.477  | NAN   |
| <i>Carpinus pubescens</i> Burk.                                                    | 2.044 | 0.750 | 22.611 | 3.221  | 4.535  | 0.075 | 39.256  | 0.108 |
| <i>Lithocarpus confinis</i> Huang                                                  | 1.233 | 0.504 | 9.907  | 2.305  | 4.035  | 0.051 | 146.543 | 0.298 |
| <i>Celtis sinensis</i> Pers.                                                       | 1.505 | 0.582 | 33.395 | 6.018  | 4.746  | 0.028 | 124.857 | 0.267 |
| <i>Evodia rutaecarpa</i> (Juss.) Benth.                                            | 1.710 | 1.052 | 20.553 | 5.206  | 3.350  | 0.046 | 130.785 | NAN   |
| <i>Machilus cavaleriei</i> Levl.                                                   | 1.799 | 0.736 | 4.576  | 2.295  | 3.873  | 0.033 | 128.742 | 0.292 |
| <i>Diospyros kaki</i> Thunb. var. <i>silvestris</i> Makino                         | 2.208 | 0.898 | 18.892 | 5.146  | 19.487 | 0.038 | 86.670  | 0.140 |
| <i>Rubus inopertus</i> (Diels) Focke                                               | 2.267 | 1.022 | 13.004 | 6.362  | 9.592  | 0.032 | 38.130  | 0.146 |
| <i>Coriaria nepalensis</i> Wall.                                                   | 1.975 | 1.007 | 10.740 | 6.598  | 4.386  | 0.034 | 128.977 | 0.254 |
| <i>Celastrus orbiculatus</i> Thunb.                                                | 1.587 | 0.645 | 57.751 | 8.028  | 6.108  | 0.063 | 154.611 | 0.286 |
| <i>Wikstroemia scytophylla</i> Diels                                               | 2.891 | 1.463 | 32.171 | 5.807  | 17.781 | 0.039 | 34.302  | 0.178 |
| <i>Viburnum foetidum</i> Wall. var. <i>ceanothoides</i> (C. H. Wright) Hand.-Mazz. | 2.052 | 1.010 | 11.120 | 3.524  | 15.708 | 0.093 | 29.463  | 0.127 |
| <i>Hedera nepalensis</i> K. Koch var. <i>sinensis</i> (Tobl.) Rehd.                | 1.776 | 0.990 | 22.427 | 3.897  | 12.692 | 0.052 | 47.895  | 0.241 |
| <i>Debregeasia longifolia</i> (Burm. f.) Wedd.                                     | 1.750 | 2.185 | 27.551 | 4.012  | 17.235 | 0.052 | 70.036  | NAN   |
| <i>Rubus parvifolius</i> L.                                                        | 1.609 | 1.187 | 17.718 | 7.172  | 6.001  | 0.037 | 56.895  | 0.203 |
| <i>Rosa roxbunghii</i>                                                             | 2.710 | 0.851 | 14.005 | 2.576  | 6.710  | 0.035 | 126.989 | NAN   |
| <i>Mallotus repandus</i> (Willd.) Muell. Arg.                                      | 2.279 | 1.065 | 38.617 | 6.274  | 9.152  | 0.058 | 44.193  | 0.165 |
| <i>Mahonia bealei</i> (Fort.) Carr.                                                | 1.588 | 1.128 | 3.668  | 1.921  | 12.520 | 0.035 | 107.006 | 0.356 |
| <i>Fallopia multiflora</i> (Thunb.) Harald.                                        | 1.774 | 1.170 | 17.305 | 14.264 | 15.485 | 0.038 | 47.187  | 0.216 |



|                                                 |       |       |        |       |        |       |         |       |
|-------------------------------------------------|-------|-------|--------|-------|--------|-------|---------|-------|
| <i>Conyza canadensis</i> (L.) Cronq.            | 4.065 | 1.634 | 15.811 | 4.141 | 17.740 | 0.986 | 24.732  | 0.108 |
| <i>Ipomoea batatas</i> (L.) Lam.                | 1.865 | 1.129 | 24.040 | 5.482 | 23.532 | 0.061 | 62.852  | 0.279 |
| <i>Senecio scandens</i> Buch.-Ham. ex D. Don    | 2.662 | 2.717 | 16.101 | 3.235 | 18.597 | 0.017 | 53.808  | 0.140 |
| <i>Vitis piasezkii</i> Maxim.                   | 1.916 | 1.128 | 11.997 | 3.851 | 16.682 | 0.038 | 34.221  | 0.140 |
| <i>Clematis urophylla</i> Franch.               | 1.748 | 1.005 | 18.976 | 6.320 | 16.973 | 0.051 | 146.013 | 0.102 |
| <i>Bauhinia glauca</i> (Wall. ex Benth.) Benth. | 2.288 | 0.816 | 29.374 | 3.691 | 6.523  | 0.075 | 49.821  | 0.127 |
| <i>Caesalpinia decapetala</i> (Roth) Alston     | 2.545 | 1.000 | 27.642 | 3.815 | 11.993 | 0.053 | 56.817  | 0.184 |
| <i>Paederia scandens</i> (Lour.) Merr.          | 2.137 | 0.933 | 14.203 | 6.100 | 16.184 | 0.035 | 40.450  | 0.191 |
| <i>Cyclosorus parasiticus</i> (L.) Farwell.     | 2.316 | 1.120 | 8.950  | 6.256 | 19.523 | 0.066 | 40.863  | 0.152 |
| <i>Cyrtomium fortunei</i> J. Sm.                | 2.725 | 0.976 | 4.746  | 4.508 | 21.281 | 0.100 | 33.878  | 0.121 |
| <i>Pteris vittata</i> L.                        | 2.261 | 0.830 | 4.202  | 2.218 | 11.766 | 0.035 | 57.897  | 0.140 |

Note that all auxiliary dataset were shared from “Functional Trait database of terrestrial ecosystems in China (China\_Trait)”, and the associated data presented in this table were averaged values.

Supplementary Table S3. Pearson correlations of the area-based photosynthetic capacity ( $A_{\text{sat}}$ ,  $V_{\text{cmax}}$ , and  $J_{\text{max}}$ ) with leaf nutrient contents and leaf thickness ( $LT$ ).  $A_{\text{sat}}$ : the light-saturated net photosynthesis;  $V_{\text{cmax}}$ : the maximum carboxylation rate;  $J_{\text{max}}$ : the maximum electron transport rate.

|                   | N      | P      | Ca     | Mg    | K     | Na     | $LT$  | $LMA$  |
|-------------------|--------|--------|--------|-------|-------|--------|-------|--------|
| $A_{\text{sat}}$  | -0.008 | 0.258* | -0.103 | 0.089 | 0.018 | -0.087 | 0.146 | -0.113 |
| $V_{\text{cmax}}$ | 0.016  | 0.287* | -0.052 | 0.117 | 0.025 | -0.104 | 0.186 | -0.070 |
| $J_{\text{max}}$  | 0.095  | 0.292* | 0.008  | 0.178 | 0.106 | -0.101 | 0.167 | -0.029 |

\*\* $P < 0.01$  (2-tailed), \* $P < 0.05$  (2-tailed).

Supplementary Table S4. Coefficients of multivariate stepwise regression.  $V_{\text{cmax}}$ : the maximum carboxylation rate;  $J_{\text{max}}$ : the maximum electron transport rate.

| Variance      | $V_{\text{cmax}}$ |        |       | $J_{\text{max}}$ |        |       |
|---------------|-------------------|--------|-------|------------------|--------|-------|
|               | AIC               | $P$    | $R^2$ | AIC              | $P$    | $R^2$ |
| N             | -62.26            | <0.001 | 0.275 | -2.15            | <0.001 | 0.299 |
| N,Mg          | -69.71            | <0.001 | 0.395 | -12.31           | <0.001 | 0.440 |
| N,Mg, $LT$    | -73.59            | <0.001 | 0.431 | -12.22           | <0.001 | 0.490 |
| N,Mg, $LT$ ,P | -66.54            | <0.001 | 0.491 | -9.34            | <0.001 | 0.530 |

Supplementary Table S5. Pearson correlations of mass-based leaf nutrient contents and leaf thickness (*LT*)

|            | N | P       | Ca     | Mg      | K       | Na      | <i>LT</i> | <i>LMA</i> |
|------------|---|---------|--------|---------|---------|---------|-----------|------------|
| N          | 1 | 0.476** | 0.023  | -0.081  | 0.419** | 0.394** | -0.414**  | -0.400**   |
| P          |   | 1       | -0.039 | 0.080   | 0.480** | 0.131   | 0.066     | -0.269*    |
| Ca         |   |         | 1      | 0.317** | -0.121  | -0.048  | 0.065     | 0.094      |
| Mg         |   |         |        | 1       | 0.093   | -0.033  | -0.160    | 0.003      |
| K          |   |         |        |         | 1       | 0.198   | 0.003     | -0.085     |
| Na         |   |         |        |         |         | 1       | -0.211    | -0.213     |
| <i>LT</i>  |   |         |        |         |         |         | 1         | 0.594**    |
| <i>LMA</i> |   |         |        |         |         |         |           | 1          |

\*\* $P < 0.01$  (2-tailed), \* $P < 0.05$  (2-tailed).

Supplementary Table S6. Pearson correlations of mass-based photosynthetic capacity ( $V_{\text{cmax}}$  and  $J_{\text{max}}$ ) with leaf nutrient contents and leaf thickness ( $LT$ ).  $A_{\text{sat}}$ : the light-saturated net photosynthesis;  $V_{\text{cmax}}$ : the maximum carboxylation rate;  $J_{\text{max}}$ : the maximum electron transport rate.

|                   | N       | P       | Ca     | Mg      | K       | Na      | $LT$     | $LMA$    |
|-------------------|---------|---------|--------|---------|---------|---------|----------|----------|
| $A_{\text{sat}}$  | 0.525** | 0.455** | -0.005 | 0.298*  | 0.310*  | 0.395*  | -0.391** | -0.722** |
| $V_{\text{cmax}}$ | 0.524** | 0.436** | 0.014  | 0.303*  | 0.299*  | 0.356** | -0.401** | -0.727** |
| $J_{\text{max}}$  | 0.546** | 0.403** | 0.020  | 0.330** | 0.336** | 0.339*  | -0.442** | -0.759** |

\*\* $P < 0.01$  (2-tailed), \* $P < 0.05$  (2-tailed).

Supplementary Table S7. Characteristics of soil and leaf in this study site. TN, Total nitrogen; TP, total phosphorus; TCa, total calcium; TMg, total magnesium; TK, total potassium; TNa, total sodium; AN, available soil nitrogen; AP, available soil phosphorus.

|                                       | TN             | TP            | TCa             | TMg             | Tk             | TNa           | AN             | AP            |
|---------------------------------------|----------------|---------------|-----------------|-----------------|----------------|---------------|----------------|---------------|
| Soil Content<br>(mg g <sup>-1</sup> ) | 7.30±0.<br>66  | 1.18±<br>0.35 | 36.48±3<br>4.95 | 22.64±1<br>4.51 | —              | —             | 69.76±<br>5.96 | 9.05±<br>5.64 |
| Soil storage<br>(t hm <sup>-2</sup> ) | 12.04          | 1.68          | —               | —               | —              | —             | 1.2            | 1.26          |
| Leaf content<br>(mg g <sup>-1</sup> ) | 23.39±<br>6.72 | 1.11±<br>0.50 | 19.25±1<br>0.33 | 4.61±<br>2.39   | 12.00±<br>6.15 | 0.07±<br>0.12 | —              | —             |

The nutrient storage of soil was reported by Chen et al. (Chen & Zhou 2017) in this study site.

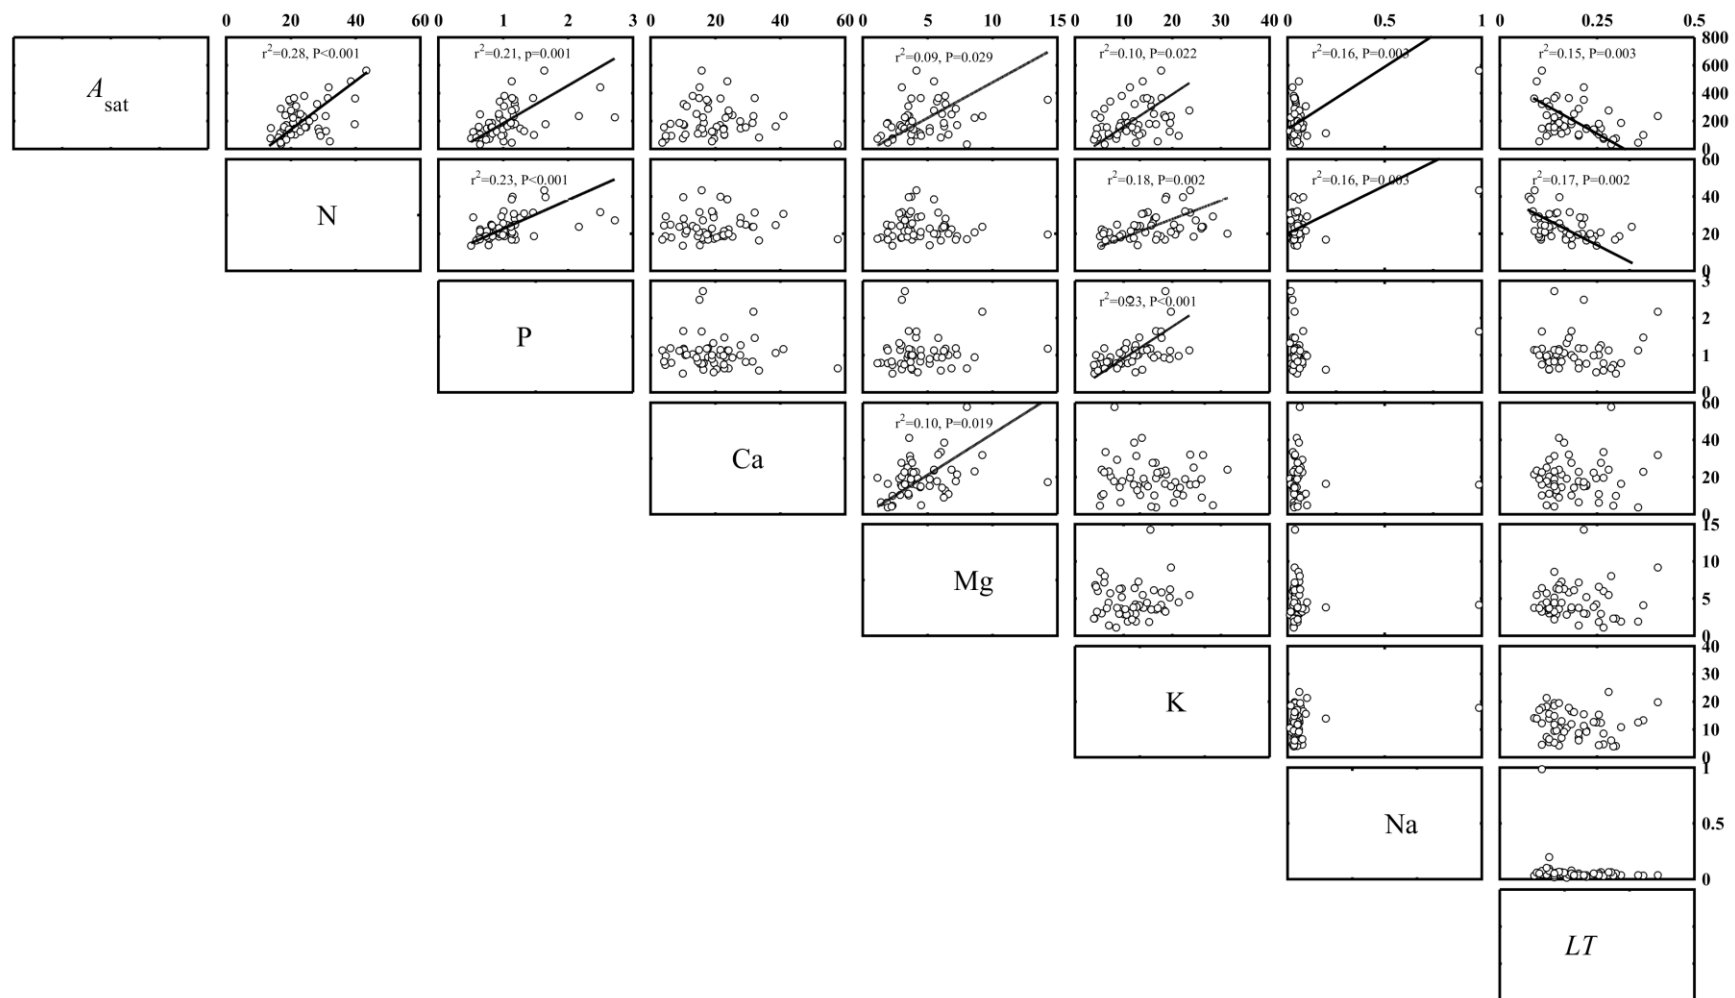

Figure S1. Relationships between of the  $A_{sat}$  (nmol g<sup>-1</sup> s<sup>-1</sup>) and leaf traits.  $A_{sat}$ , the light-saturated net photosynthesis;  $LT$ , leaf thickness (mm); Leaf nutrients (mg g<sup>-1</sup>).

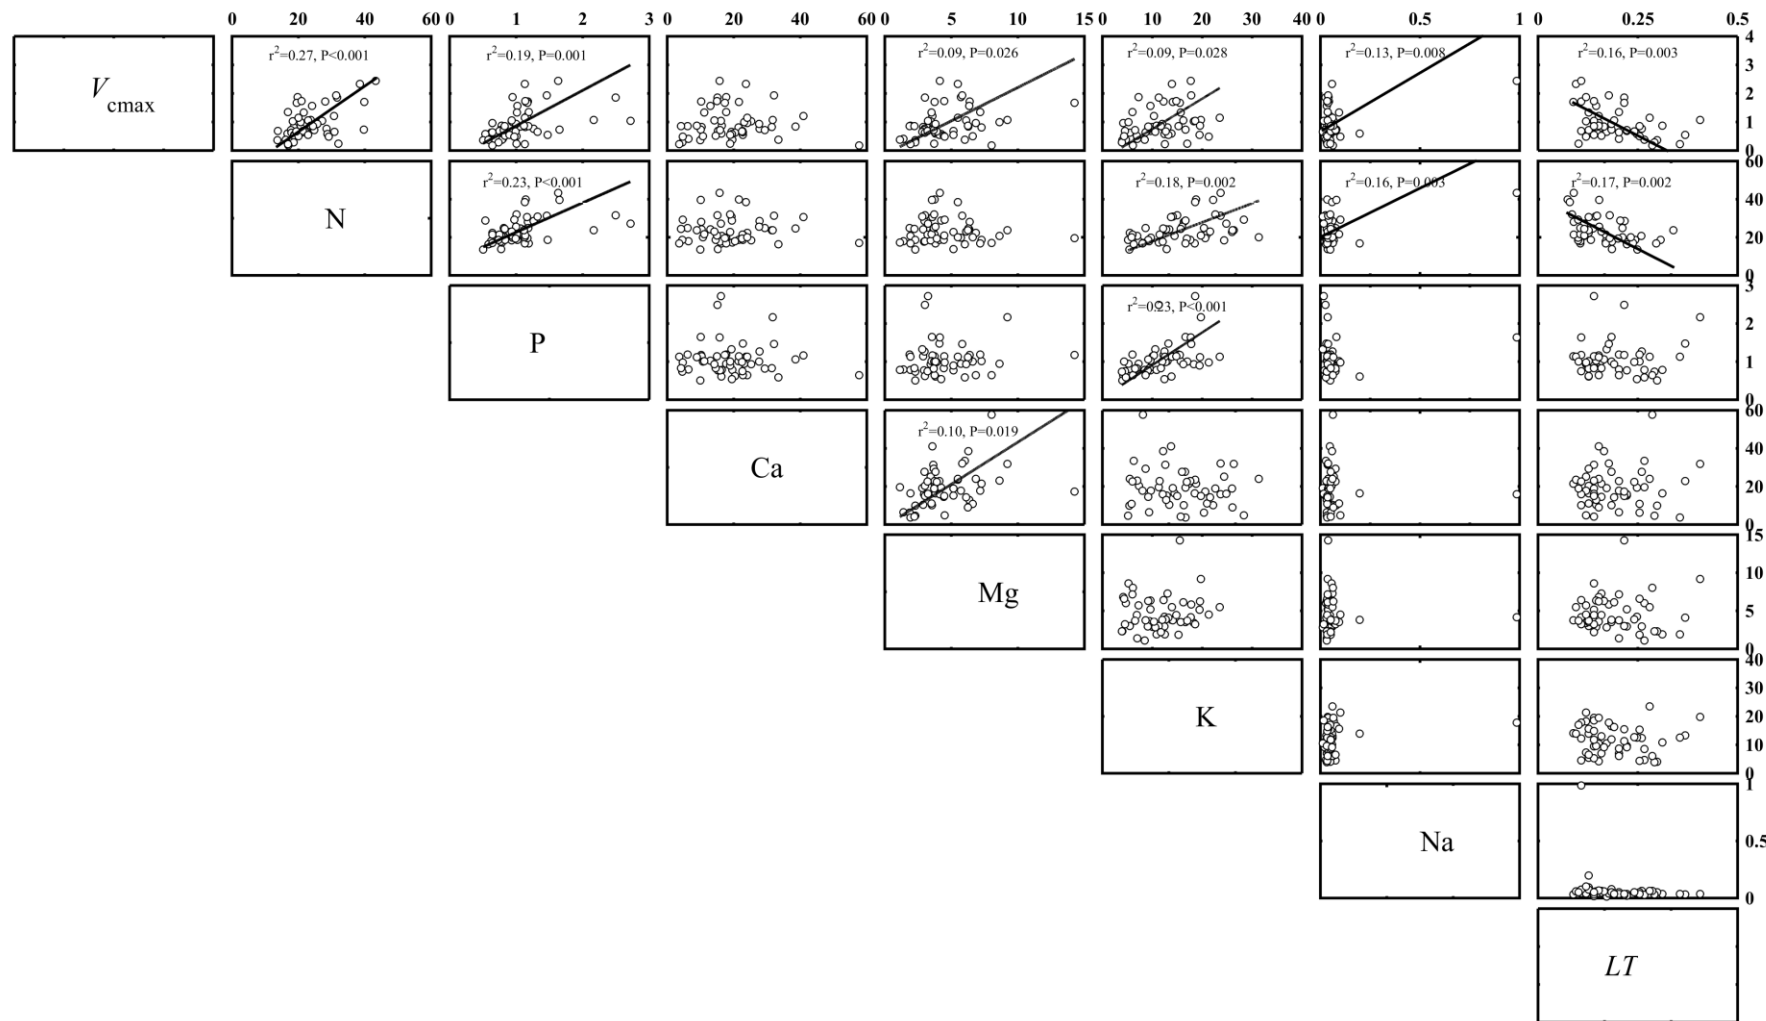

Figure S2. Relationships between of  $V_{cmax}$  ( $\mu\text{mol g}^{-1} \text{s}^{-1}$ ) and leaf traits.  $V_{cmax}$ , the maximum carboxylation rate;  $LT$ , leaf thickness (mm); Leaf nutrients ( $\text{mg g}^{-1}$ ).



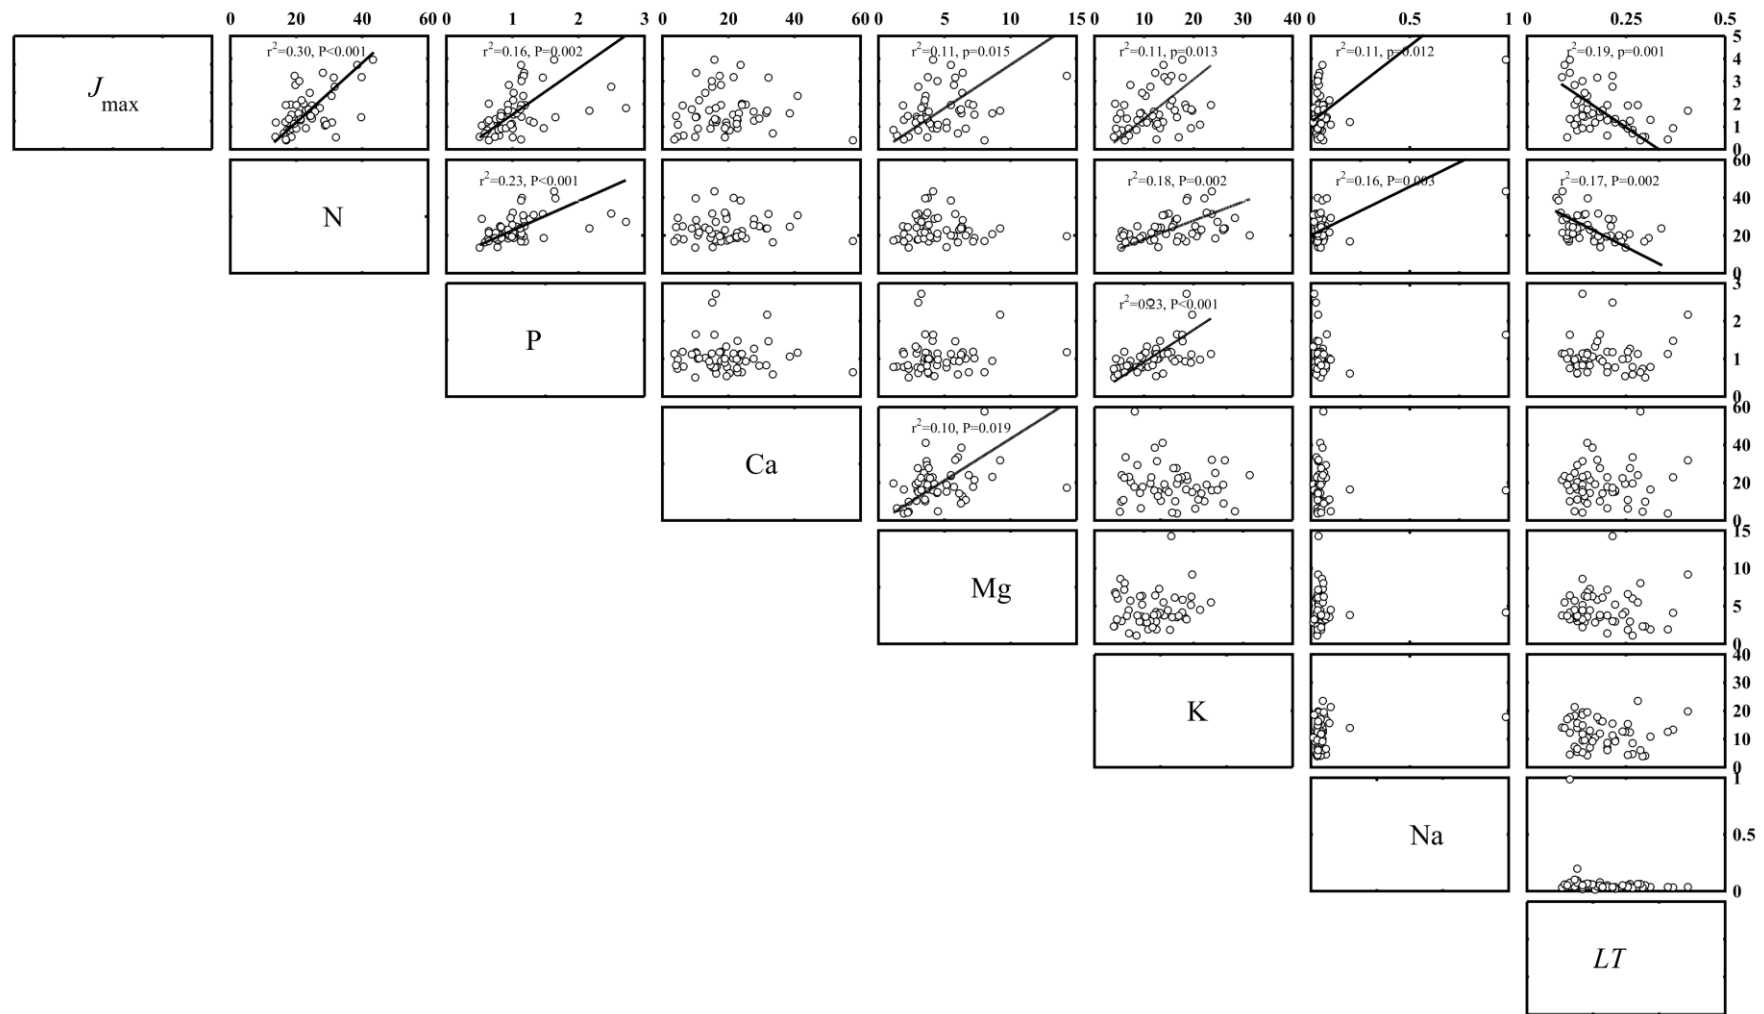

Figure S3. Relationships between of  $J_{\max}$  ( $\mu\text{mol g}^{-1} \text{s}^{-1}$ ) with leaf traits( $\text{mg g}^{-1}$ ).  $J_{\max}$ , the maximum electron transport rate;  $LT$ , leaf thickness (mm); Leaf nutrients ( $\text{mg g}^{-1}$ ).

## Reference

Chen, P. & Zhou, Y. (2017). Soil nutrient capacity and forest tree sustainability in plateau Karst region. *Earth and Enviroment*, 45, 32-37 (2017). (In Chinese)
